# Supplementary material for: The Depside Derivative Pericodepside Inhibits Cancer Cell Metastasis and Proliferation by Suppressing Epithelial–Mesenchymal Transition
Source: PubMed Central journal article supplement — ACS Omega. 2024 Feb 2;9(6):6828–36. doi: 10.1021/acsomega.3c08136 (PMC10870356; doi:10.1021/acsomega.3c08136), 2024-02-02

*Supporting Information for*

**The Depside Derivative Pericodepside Inhibits Cancer Cell Metastasis and Proliferation by Suppressing Epithelial–Mesenchymal Transition**

Rui Zhou<sup>†,1</sup>, Rundong Liu<sup>‡,1</sup>, Kyo Bin Kang<sup>§</sup>, Wonyong Kim<sup>‡,¶</sup>, Jae-Seoun Hur<sup>‡,\*</sup>,  
and Hangun Kim<sup>†,\*</sup>

<sup>†</sup>College of Pharmacy, Sunchon National University, Suncheon 57922, Republic of Korea.

<sup>‡</sup>Korean Lichen Research Institute, Sunchon National University, Suncheon 57922, Republic  
of Korea.

<sup>§</sup>Research Institute of Pharmaceutical Sciences, College of Pharmacy, Sookmyung Women's  
University, Seoul, 04310, Republic of Korea.

<sup>¶</sup>Department of Applied Biology, College of Agriculture and Life Sciences, Chonnam  
National University, Gwangju, 61186, Republic of Korea.

<sup>1</sup>These authors contributed equally to this work.

\*Corresponding author: [jshur1@sunchon.ac.kr](mailto:jshur1@sunchon.ac.kr); [hangunkim@sunchon.ac.kr](mailto:hangunkim@sunchon.ac.kr)

## Table of contents

|                                                                                                                          |        |
|--------------------------------------------------------------------------------------------------------------------------|--------|
| <b>Figure S1</b> HRESIMS spectrum of compound <b>1</b> .....                                                             | S3     |
| <b>Figure S2</b> HRESIMS spectrum of compound <b>2</b> .....                                                             | S4     |
| <b>Figure S3</b> HPLC chromatogram of compound <b>2</b> .....                                                            | S5     |
| <b>Figure S4</b> <sup>1</sup> H NMR spectrum of compound <b>2</b> in CD <sub>3</sub> OD .....                            | S6     |
| <b>Figure S5</b> <sup>13</sup> C NMR spectrum of compound <b>2</b> in CD <sub>3</sub> OD .....                           | S7     |
| <b>Figure S6</b> HSQC spectrum of compound <b>2</b> in CD <sub>3</sub> OD .....                                          | S8     |
| <b>Figure S7</b> <sup>1</sup> H- <sup>1</sup> H COSY spectrum of compound <b>2</b> in CD <sub>3</sub> OD .....           | S9     |
| <b>Figure S8</b> HMBC spectrum of compound <b>2</b> in CD <sub>3</sub> OD .....                                          | S10    |
| <b>Figure S9</b> <sup>1</sup> H NMR spectrum of compound <b>2</b> in DMSO- <i>d</i> <sub>6</sub> .....                   | S11    |
| <b>Figure S10</b> <sup>13</sup> C NMR spectrum of compound <b>2</b> in DMSO- <i>d</i> <sub>6</sub> .....                 | S12    |
| <b>Figure S11</b> HSQC spectrum of compound <b>2</b> in DMSO- <i>d</i> <sub>6</sub> .....                                | S13    |
| <b>Figure S12</b> <sup>1</sup> H- <sup>1</sup> H COSY spectrum of compound <b>2</b> in DMSO- <i>d</i> <sub>6</sub> ..... | S14-15 |
| <b>Figure S13</b> HMBC spectrum of compound <b>2</b> in DMSO- <i>d</i> <sub>6</sub> .....                                | S16-21 |

Figure S1: HRESIMS spectrum of compound 1

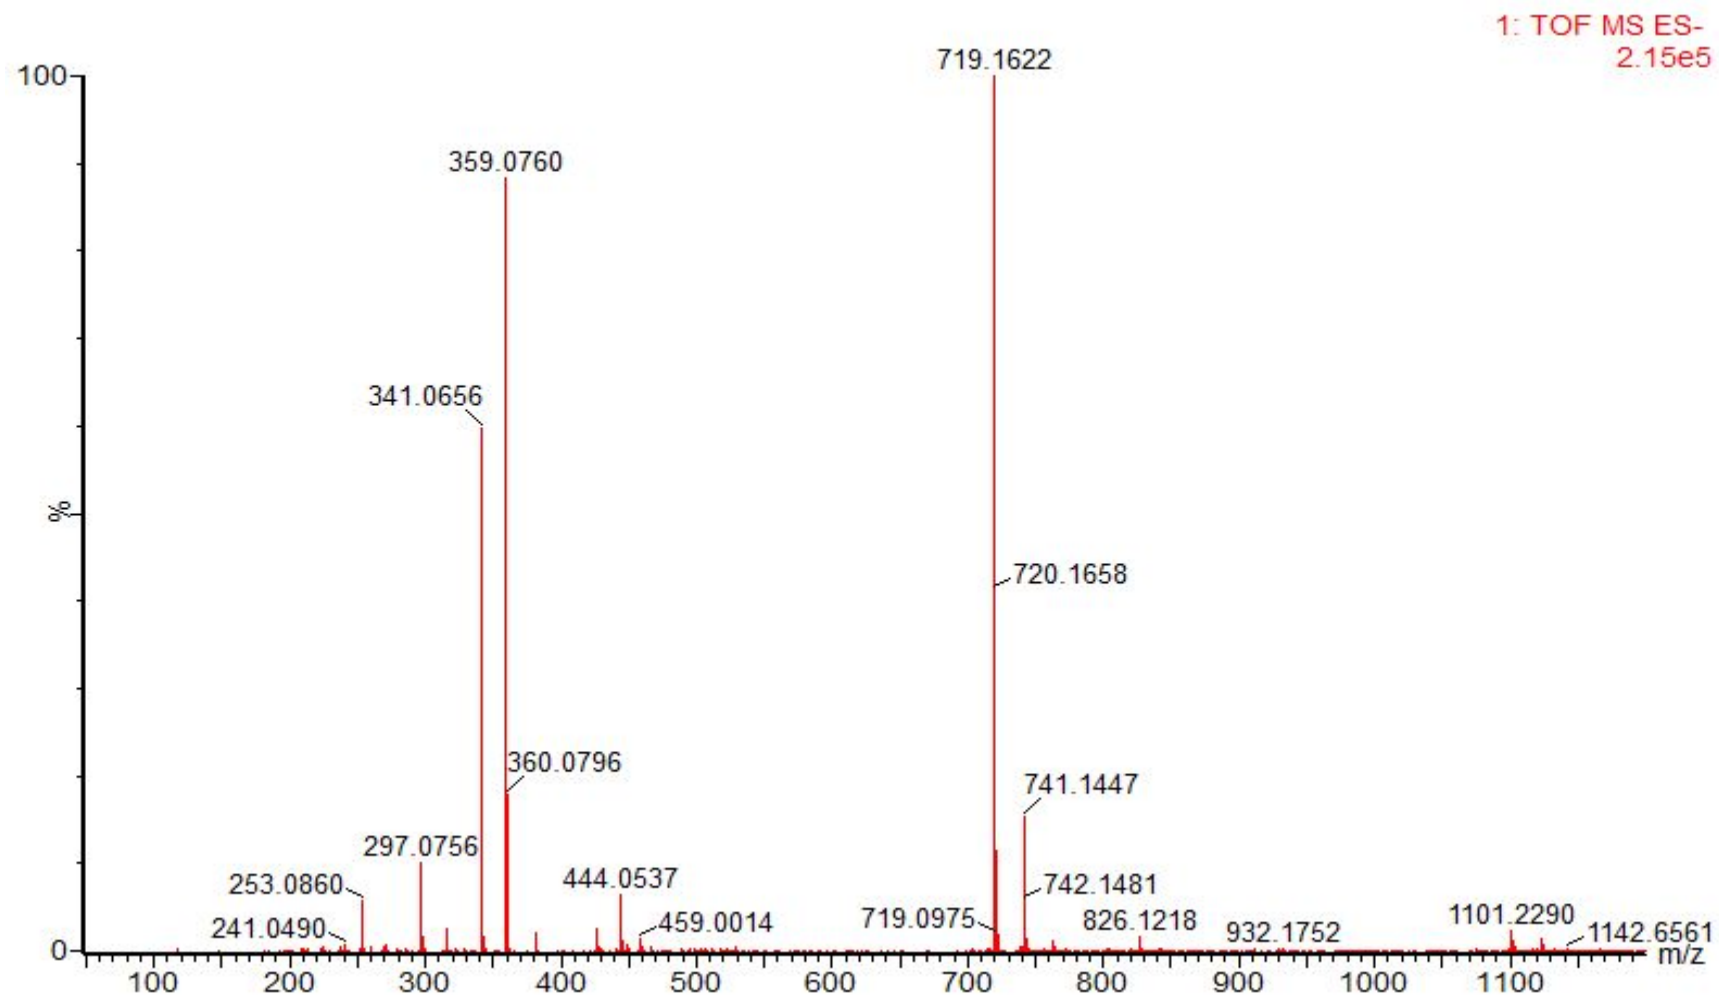

**Figure S2:** HRESIMS spectrum of compound 2

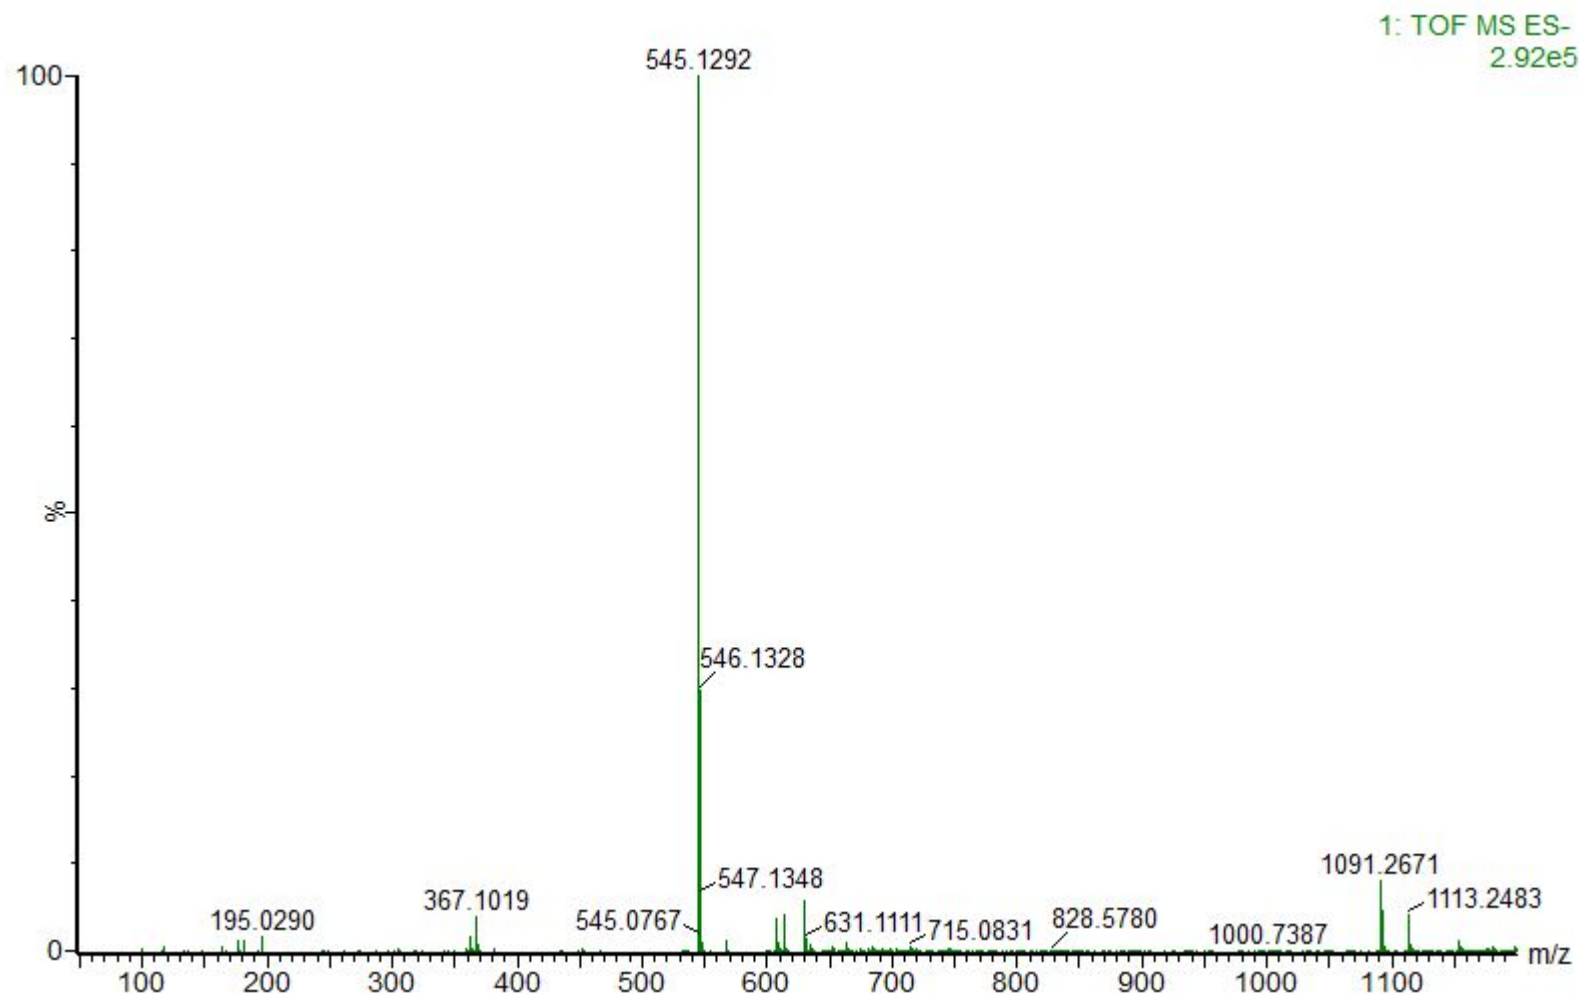

**Figure S3:** HPLC chromatogram of compound **2**. HPLC analysis employed a Shimadzu liquid chromatography system. Column: YMC-Pack ODS-A (column size, 150 × 4.6 mm; particle size, 5 μm; pore size, 12 nm; at 40 °C). The UV-active metabolite was monitored at 254 nm by a diode array UV detector. The mobile phase consisted of distilled water/trifluoroacetic acid (99.9:0.1, v/v) for pump A and methanol/trifluoroacetic acid (99.9:0.1, v/v) for pump B. The mobile phase: a flow rate of 1.0 mL/min: 0–30 min, 20–100%; 30–40 min, 100%.

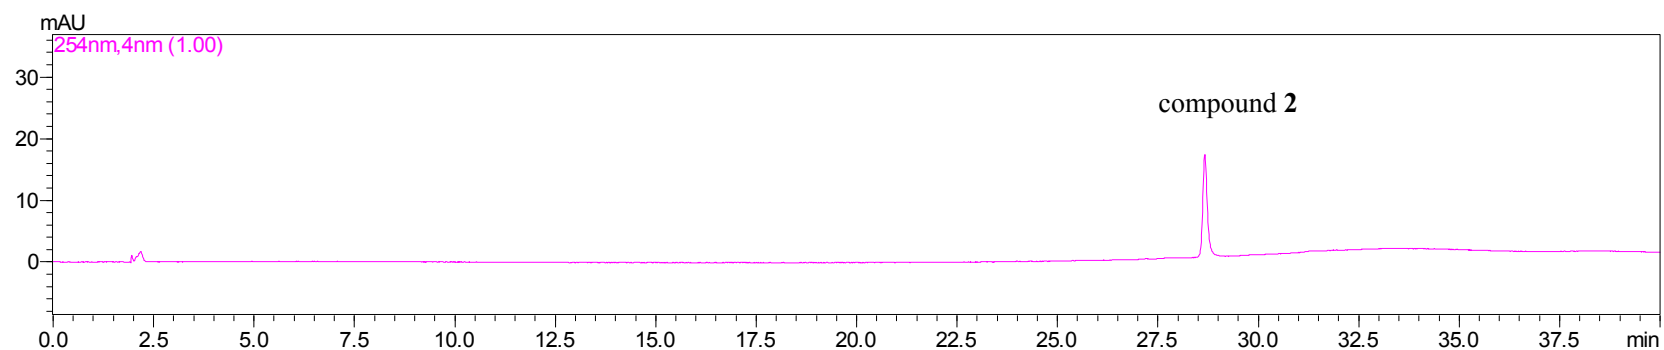

**Figure S4:**  $^1\text{H}$  NMR spectrum of compound **2** in  $\text{CD}_3\text{OD}$  at 500MHz

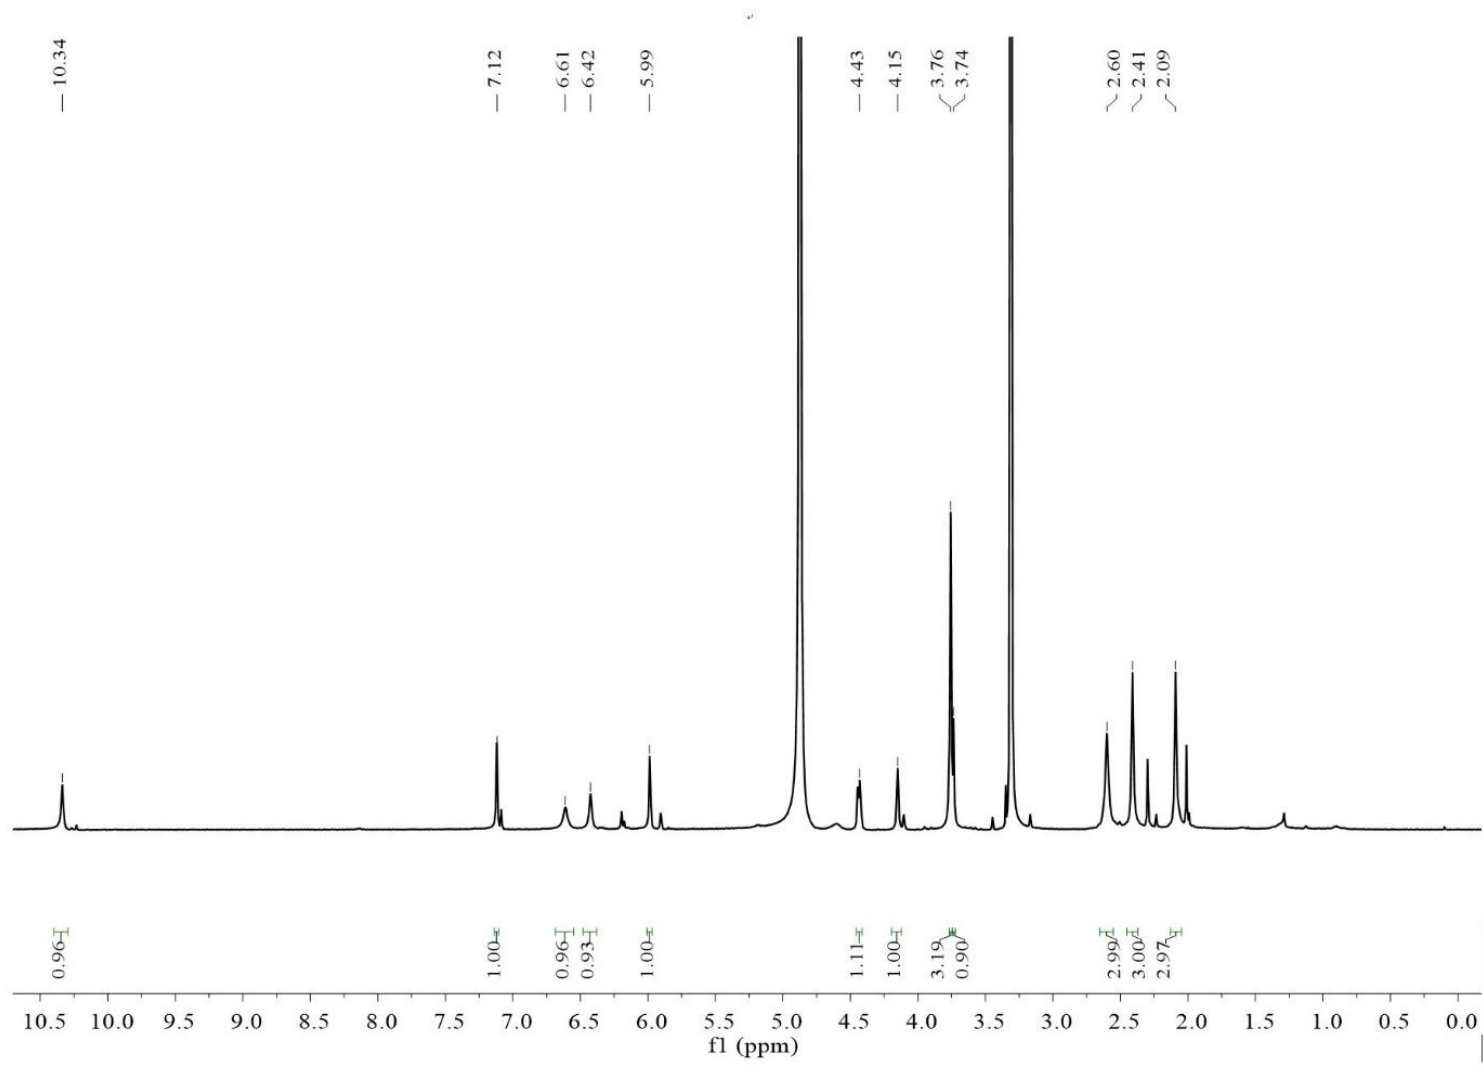

**Figure S5:**  $^{13}\text{C}$  NMR spectrum of compound **2** in  $\text{CD}_3\text{OD}$  at 125MHz

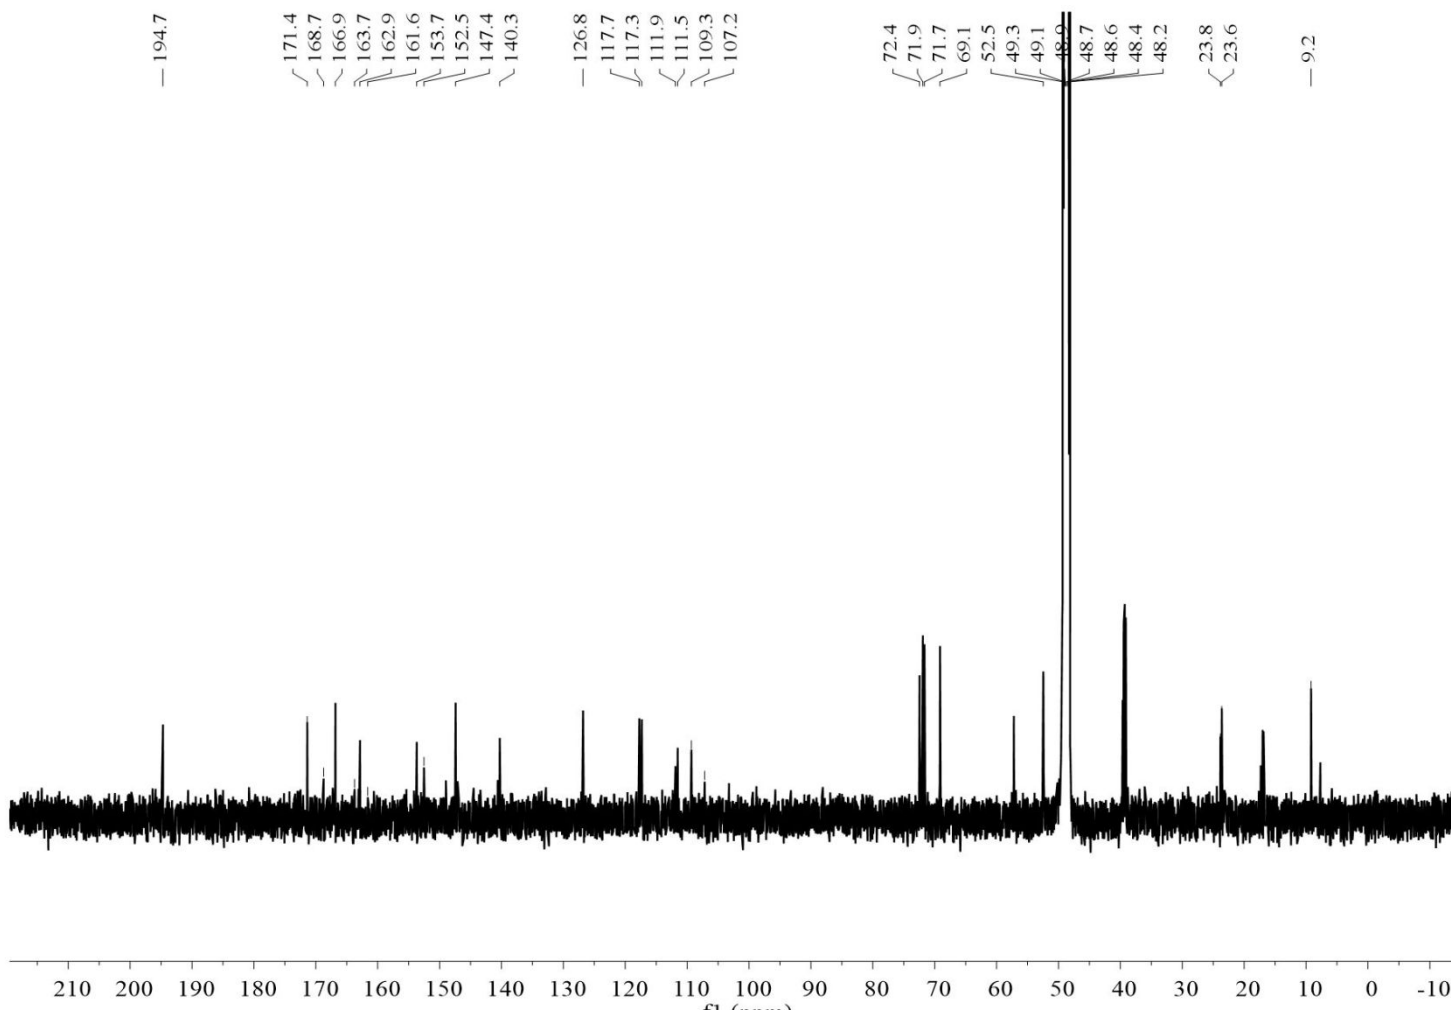

**Figure S6:** HSQC spectrum of compound **2** in CD<sub>3</sub>OD

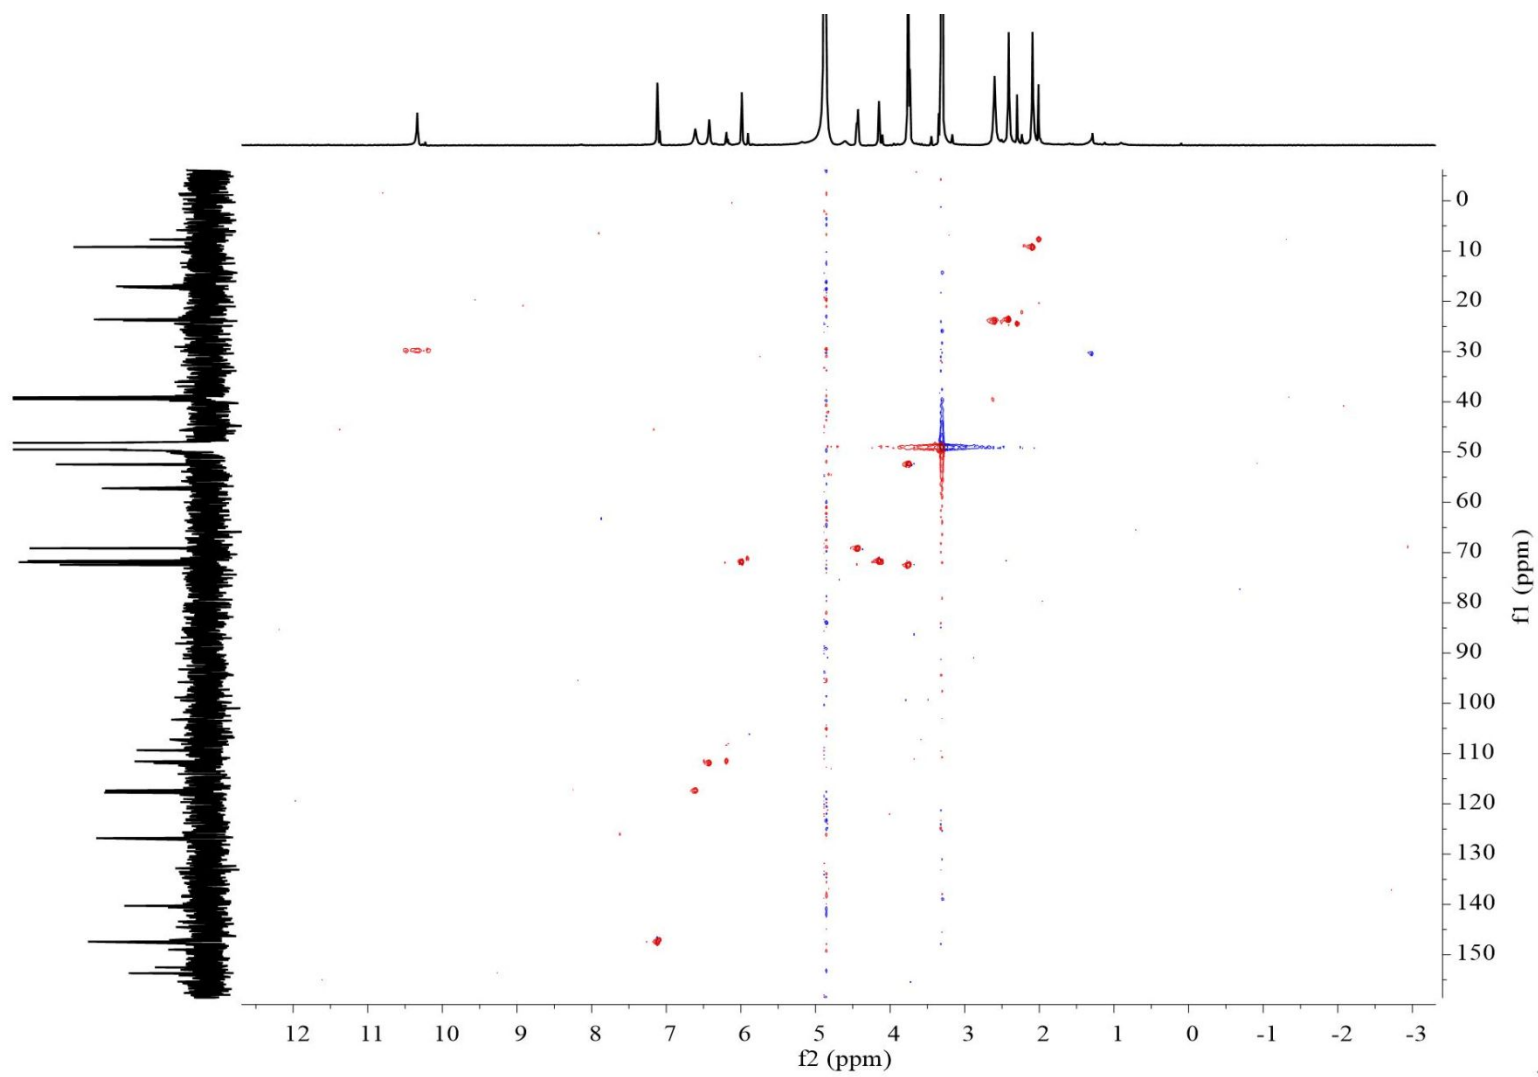



**Figure S7:**  $^1\text{H}$ - $^1\text{H}$  COSY spectrum of compound **2** in  $\text{CD}_3\text{OD}$

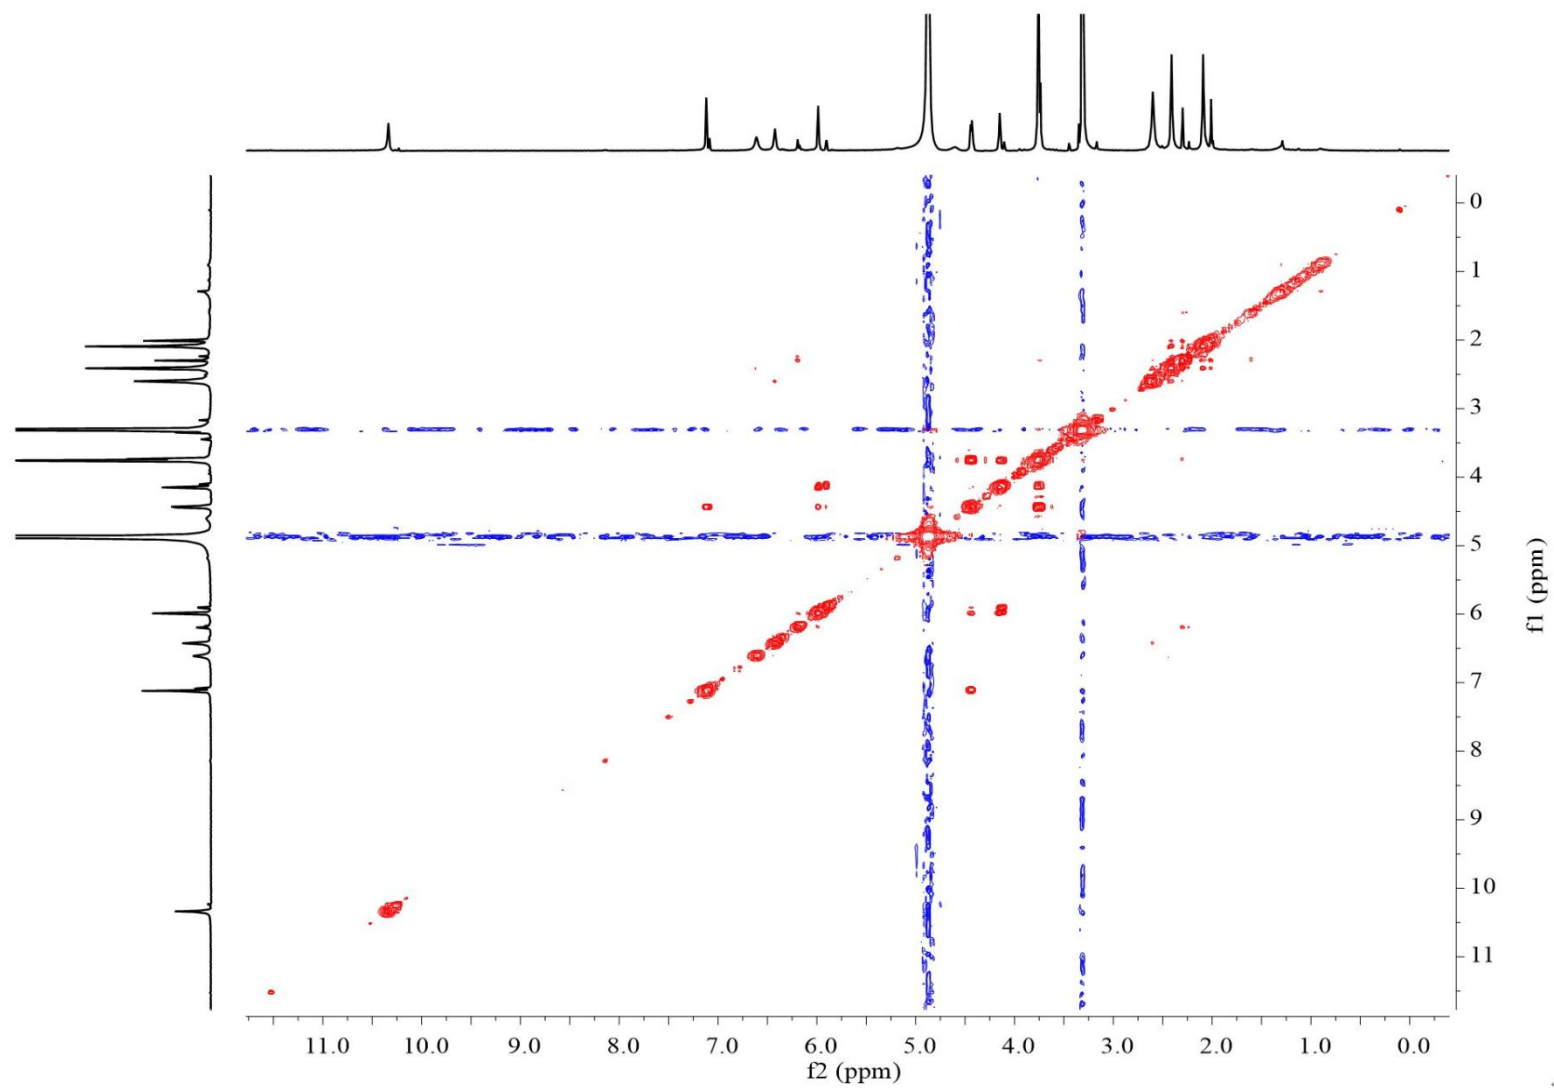

**Figure S8:** HMBC spectrum of compound **2** in CD<sub>3</sub>OD

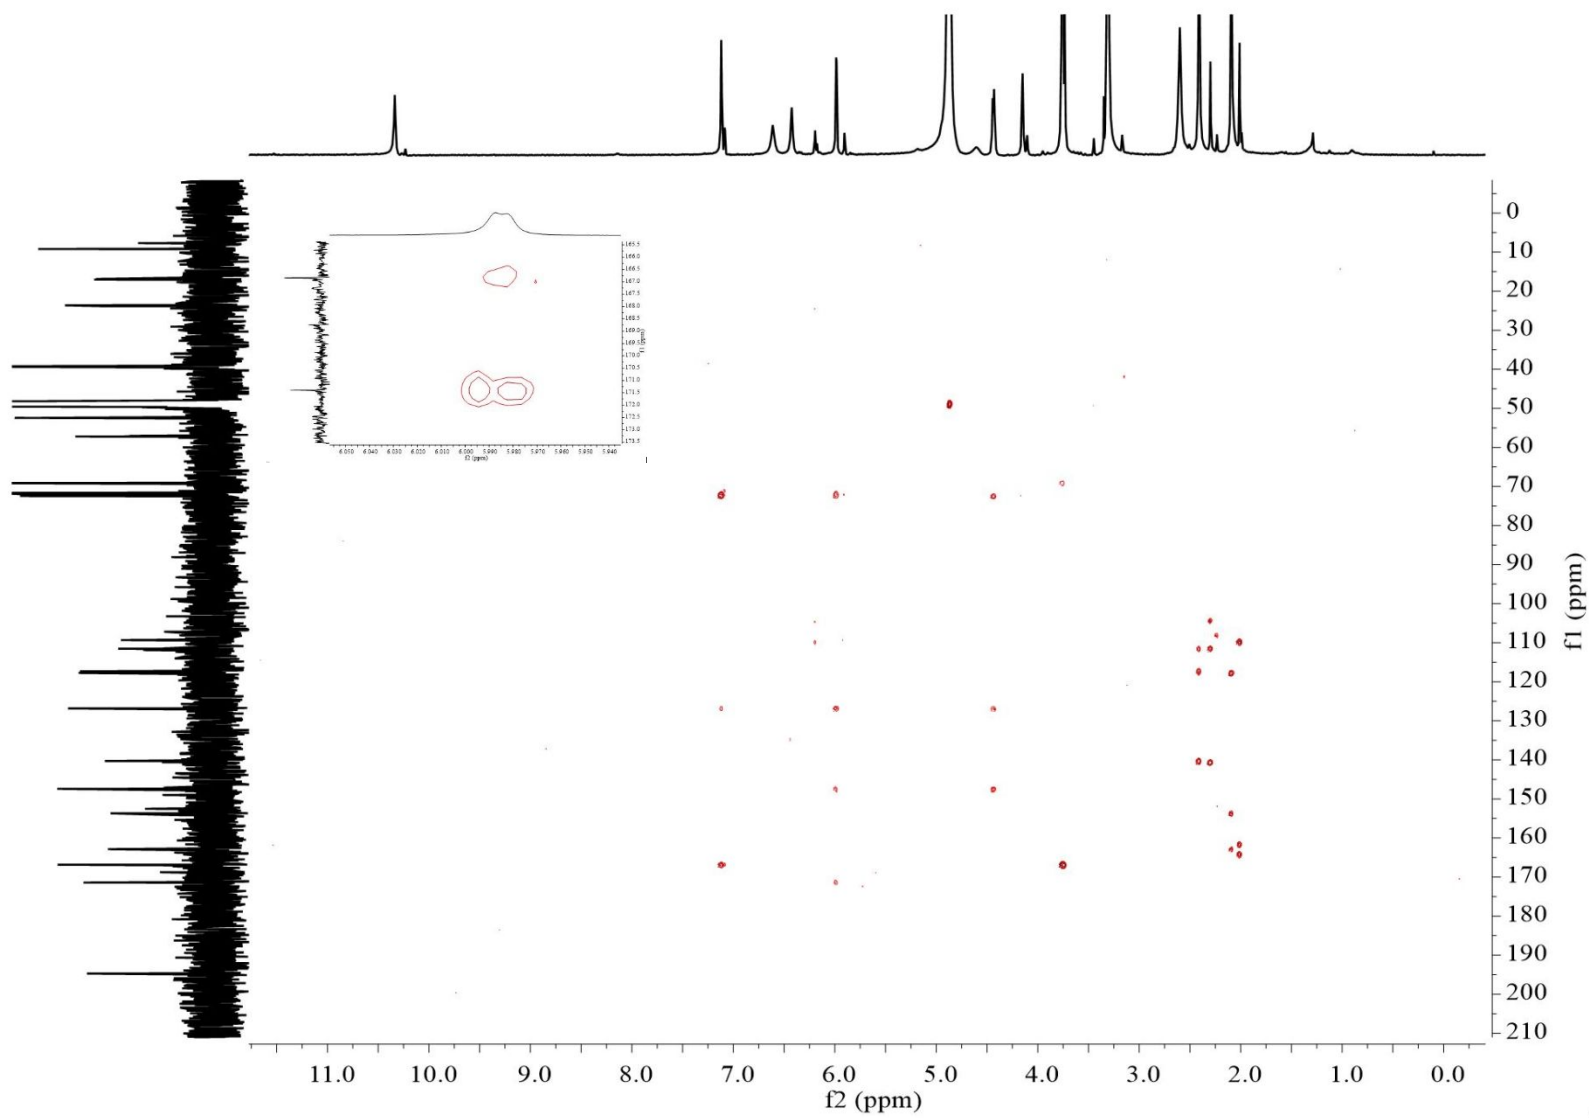

Figure S9: <sup>1</sup>H NMR spectrum of compound 2 in DMSO-d<sub>6</sub> at 400MHz

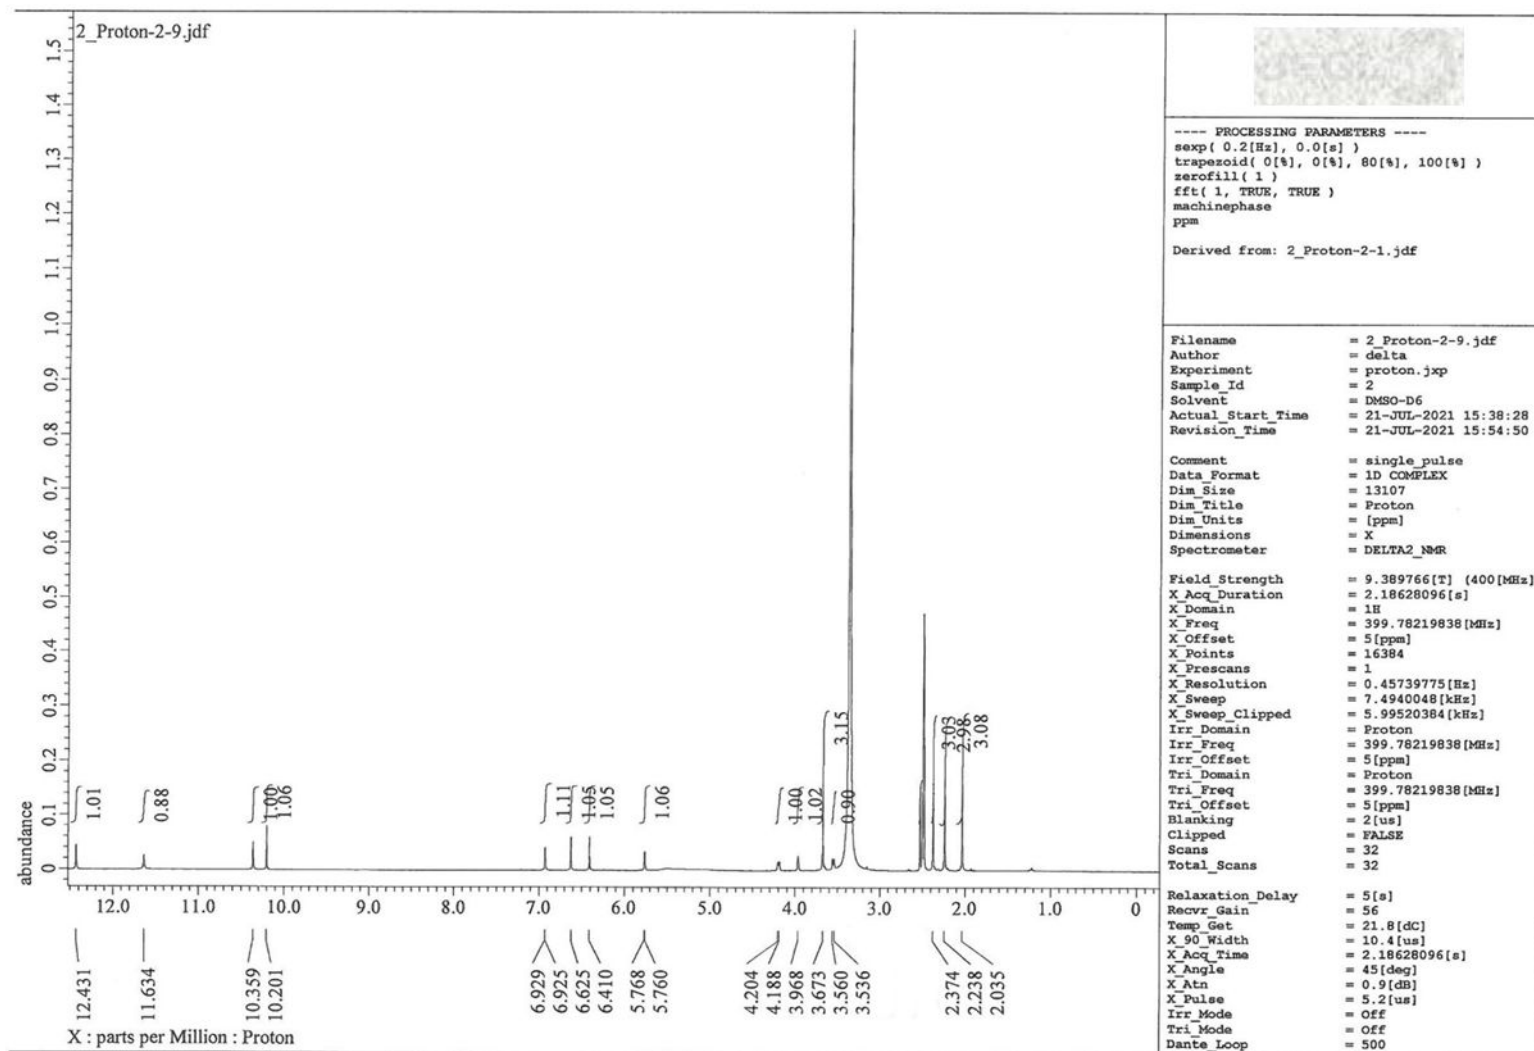

Figure S10:  $^{13}\text{C}$  NMR spectrum of compound **2** in  $\text{DMSO-}d_6$  at 100MHz

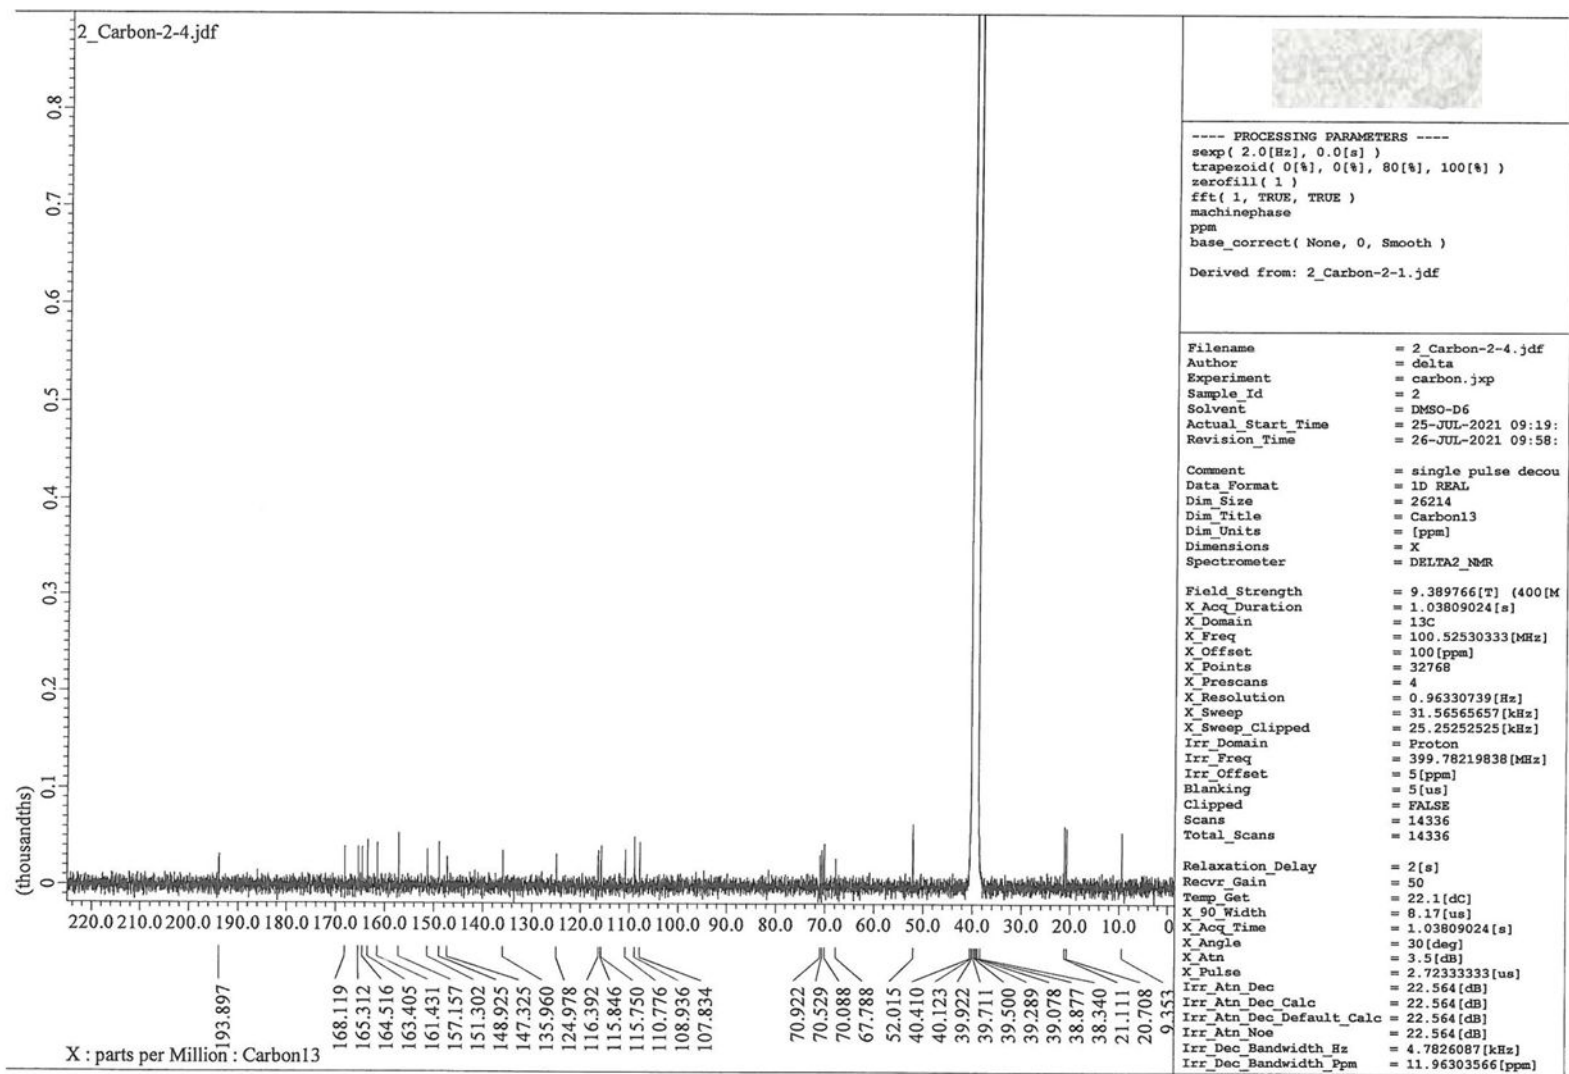

Figure S11: HSQC spectrum of compound 2 in DMSO-*d*<sub>6</sub>

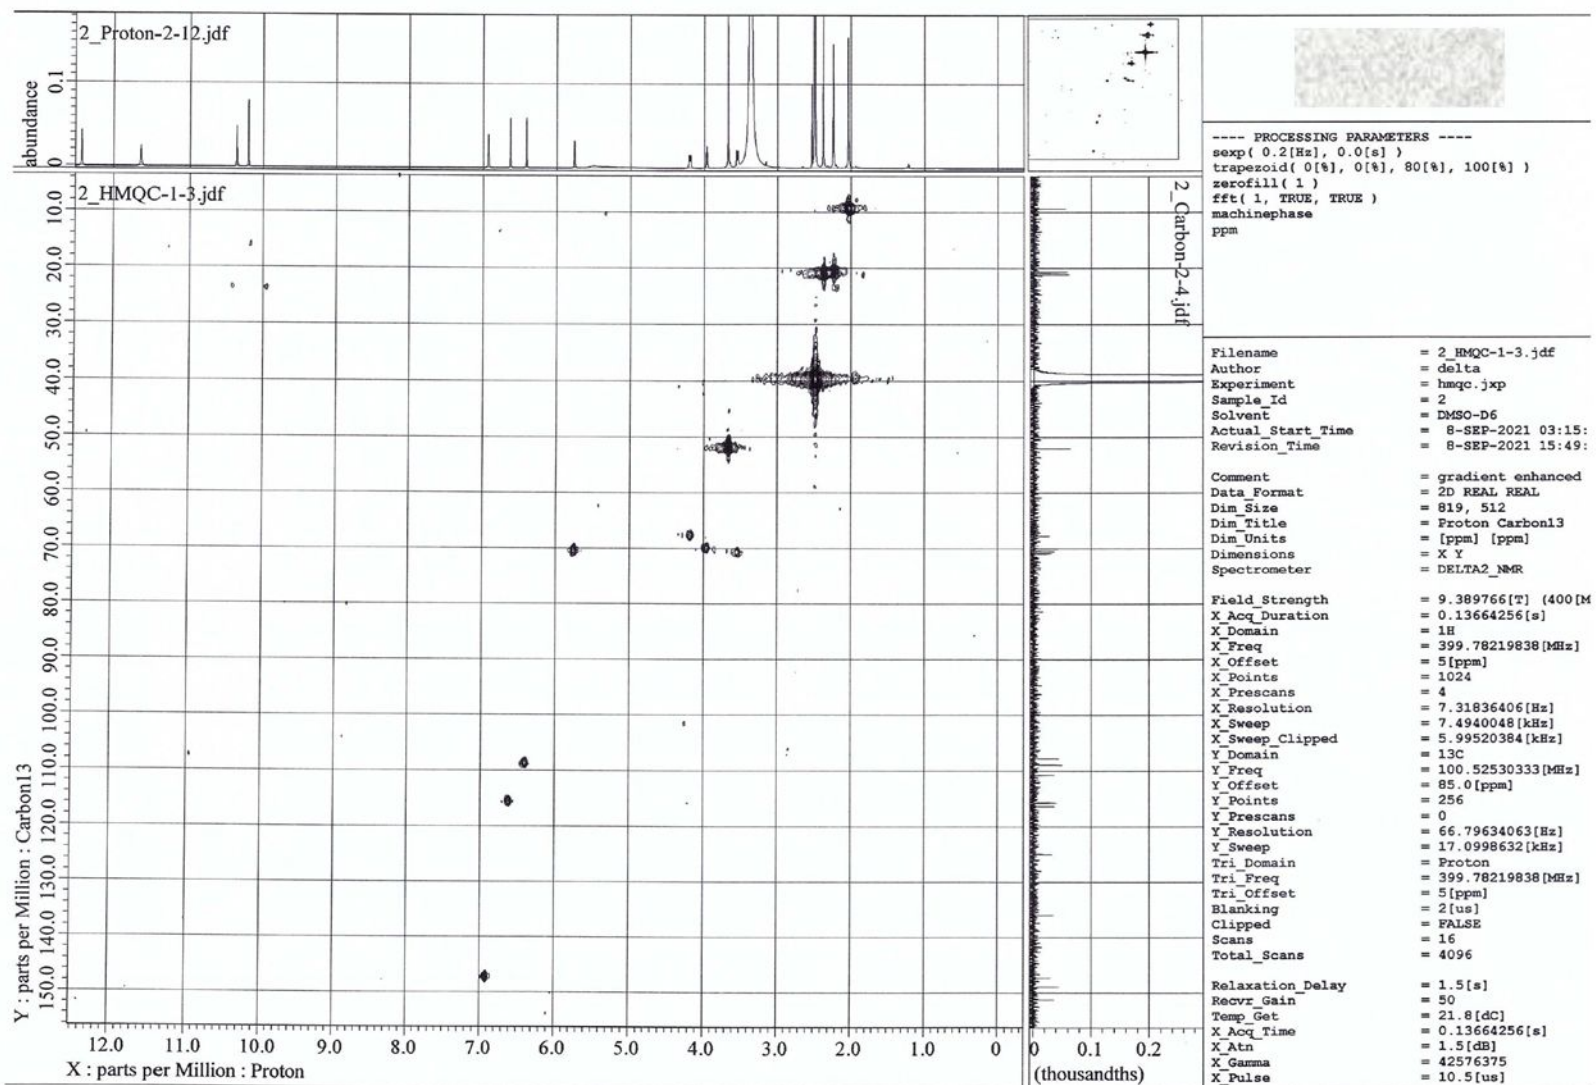



Figure S12:  $^1\text{H}$ - $^1\text{H}$  COSY spectrum of compound 2 in  $\text{DMSO}-d_6$

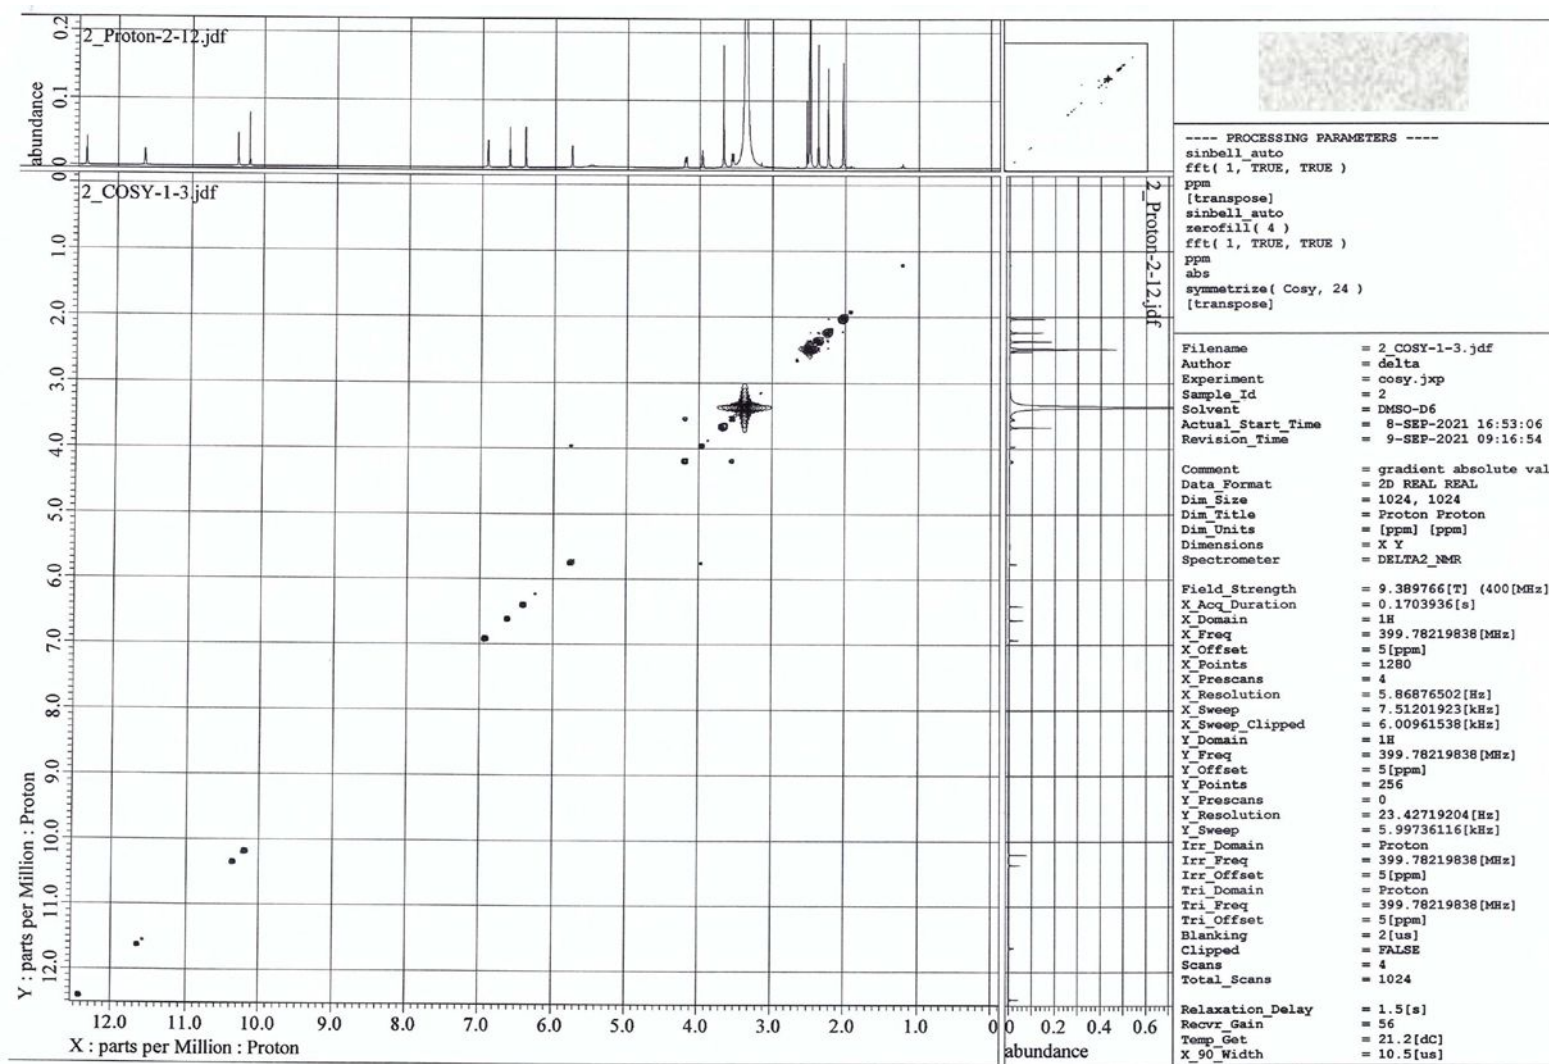

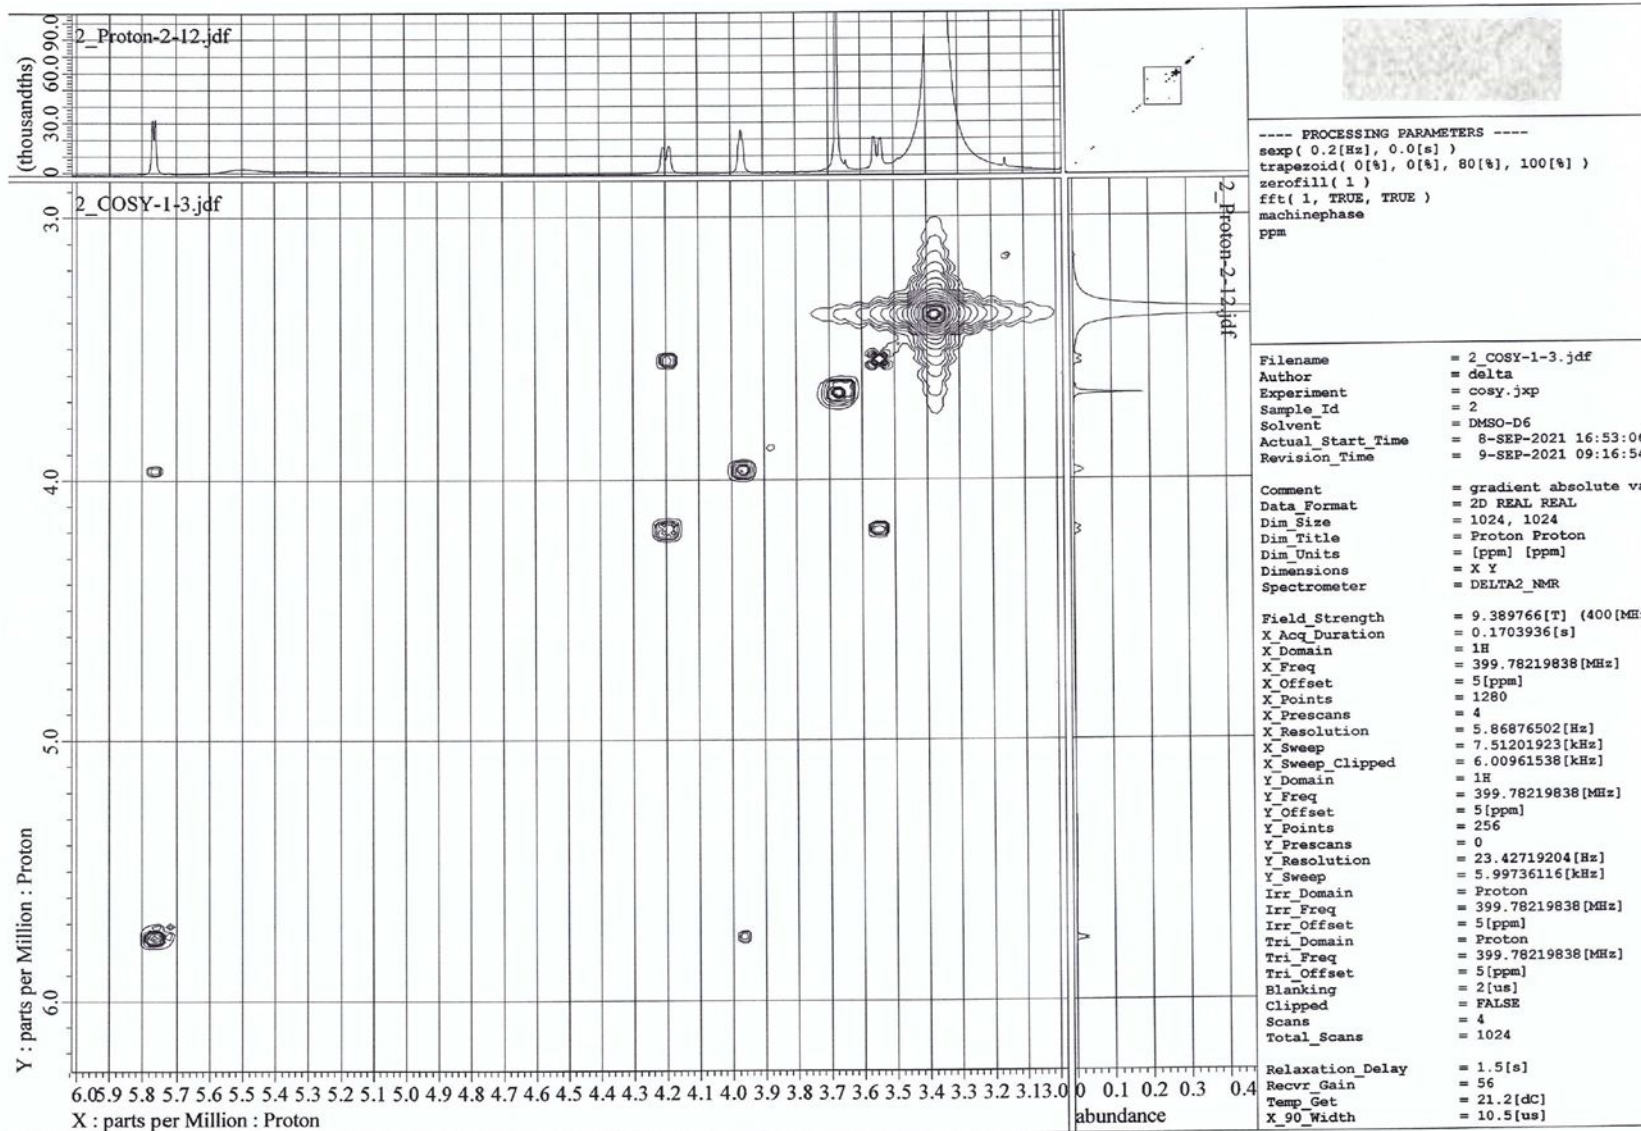

Figure S13: HMBC spectrum of compound 2 in DMSO-*d*<sub>6</sub>

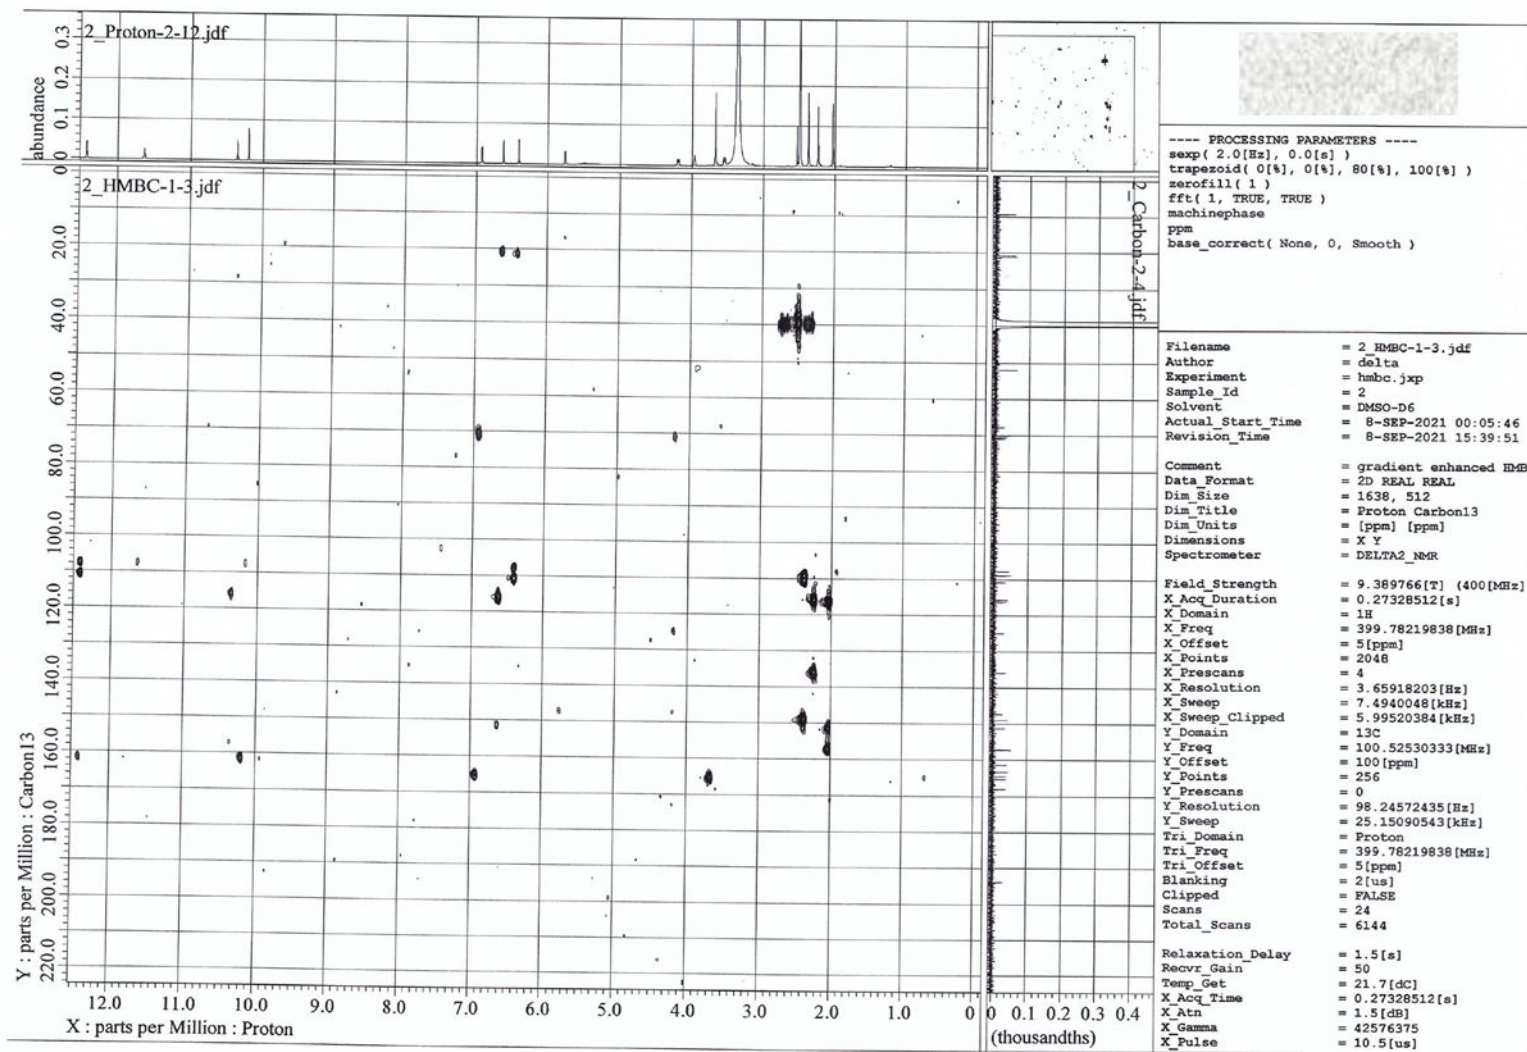



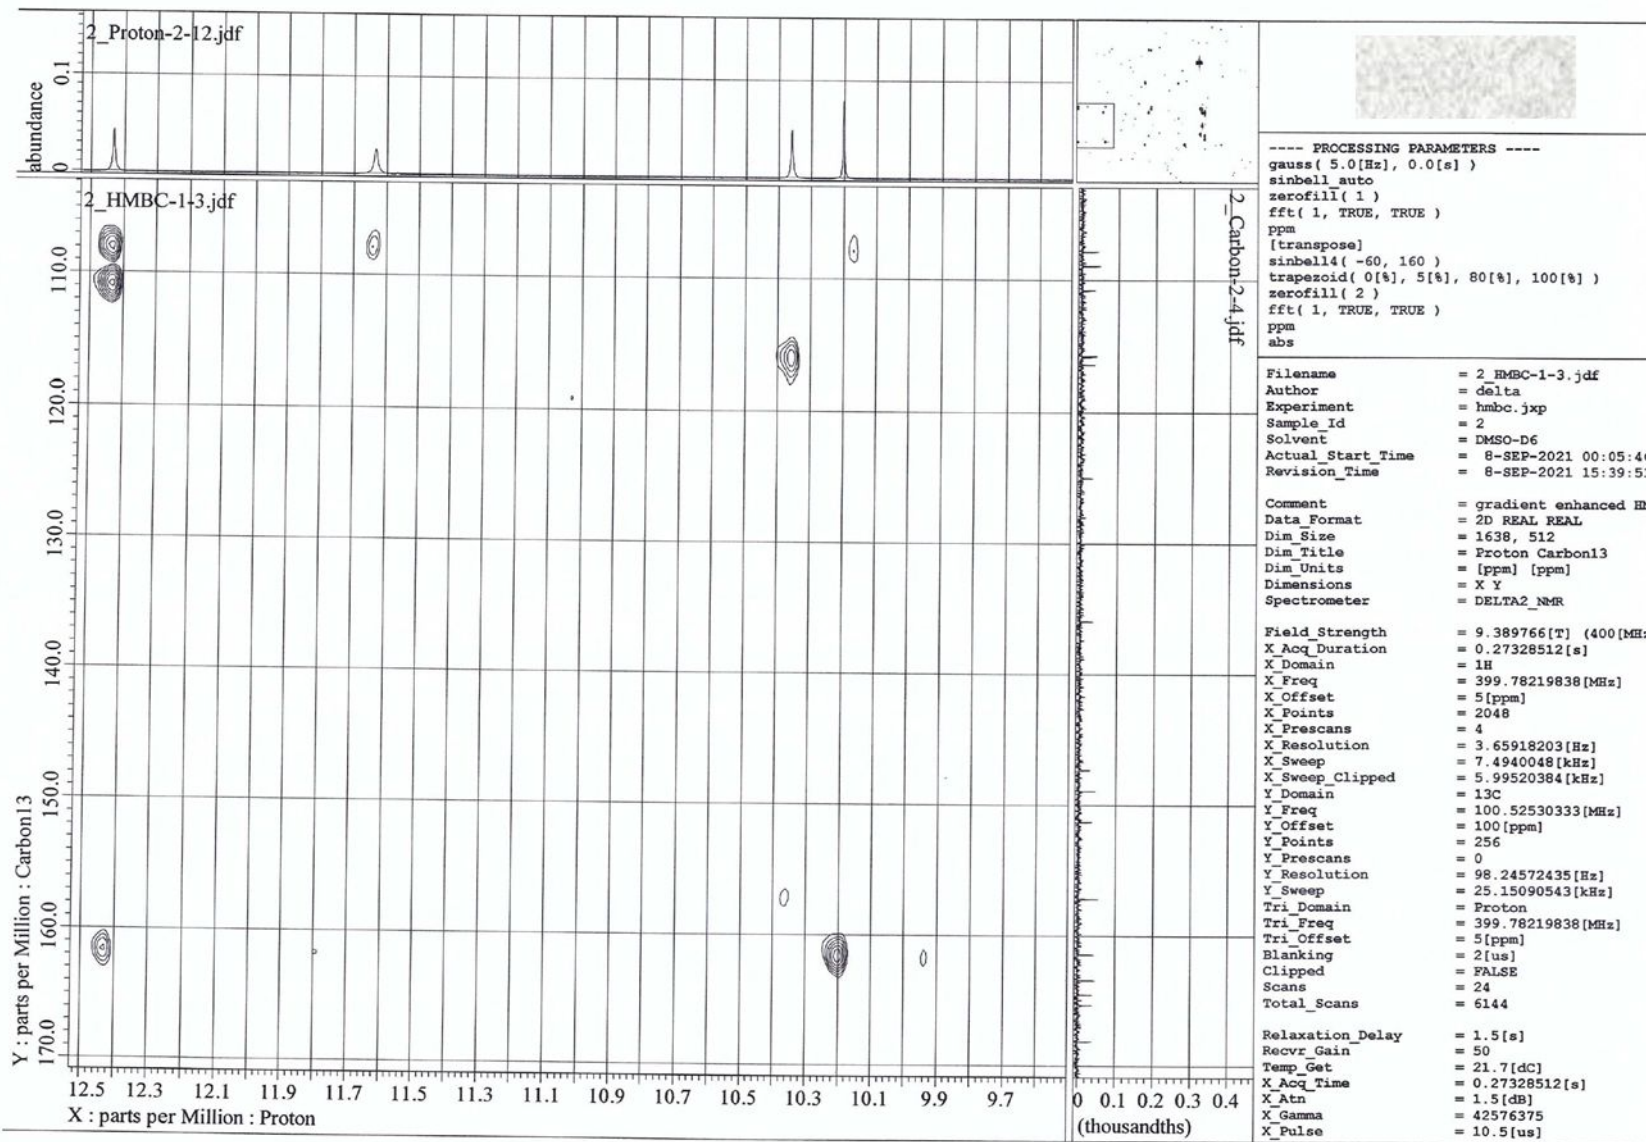

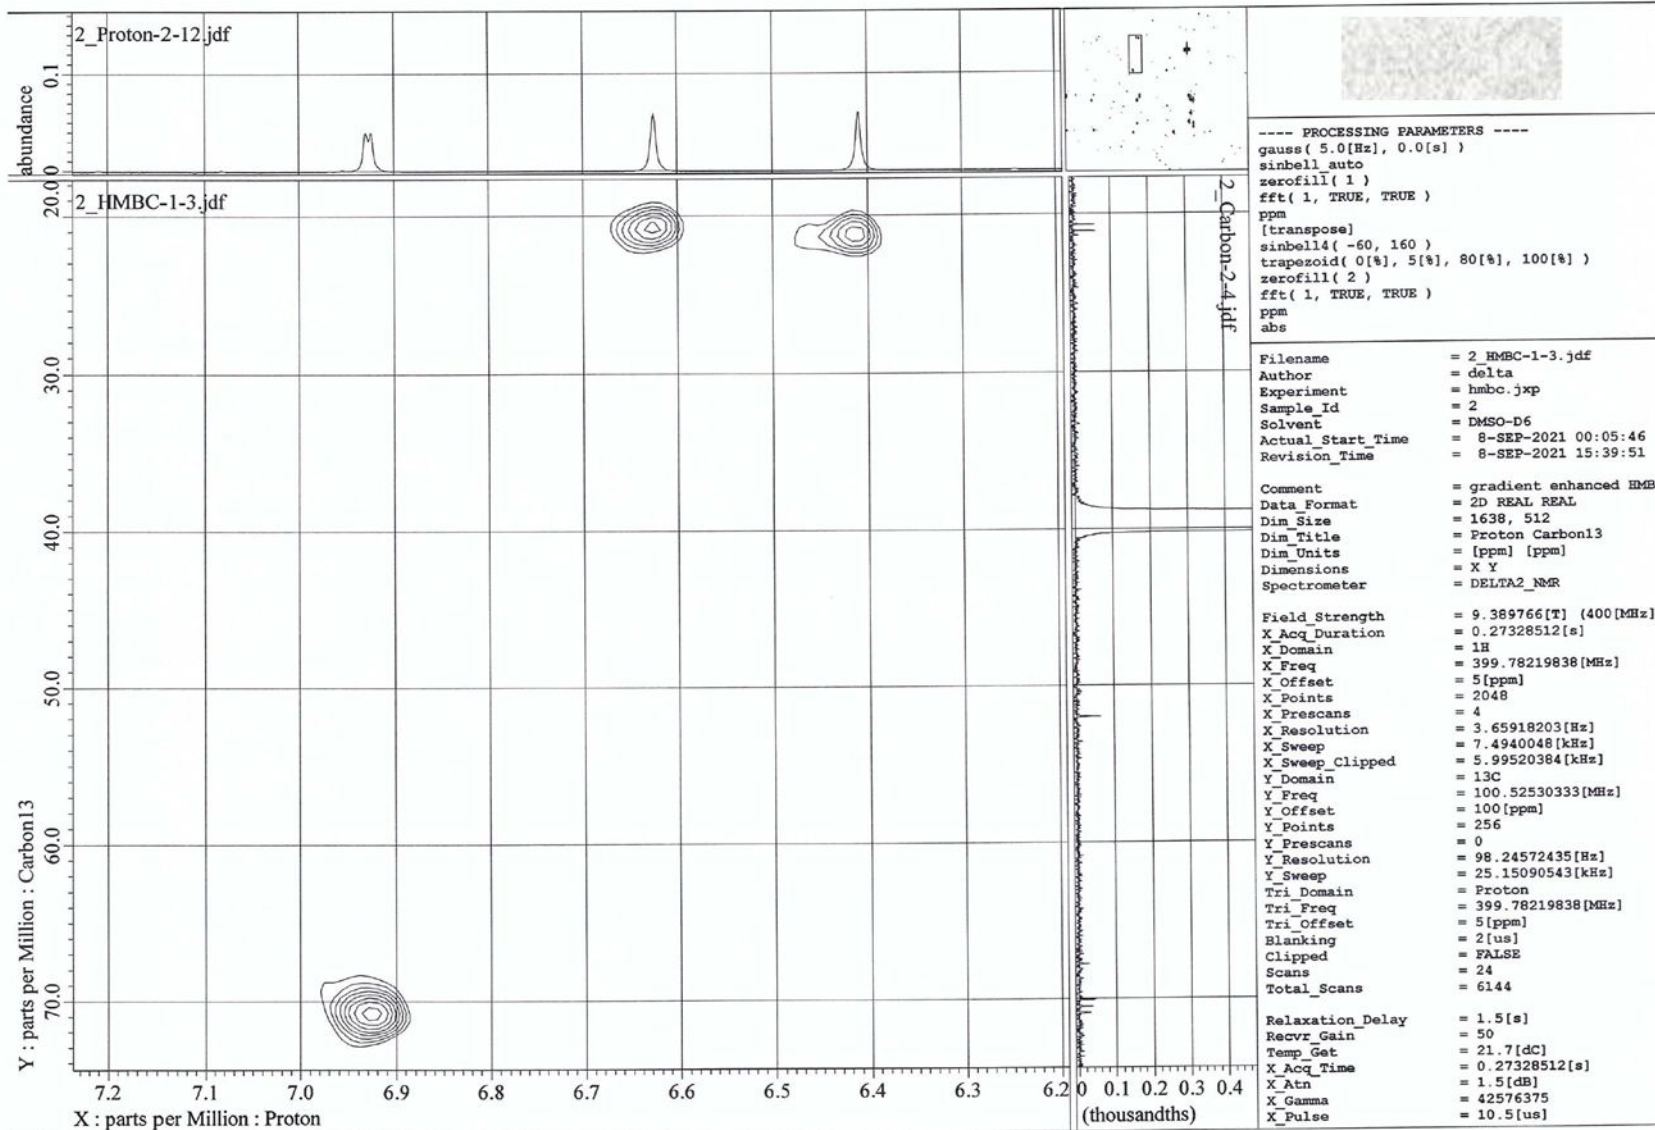

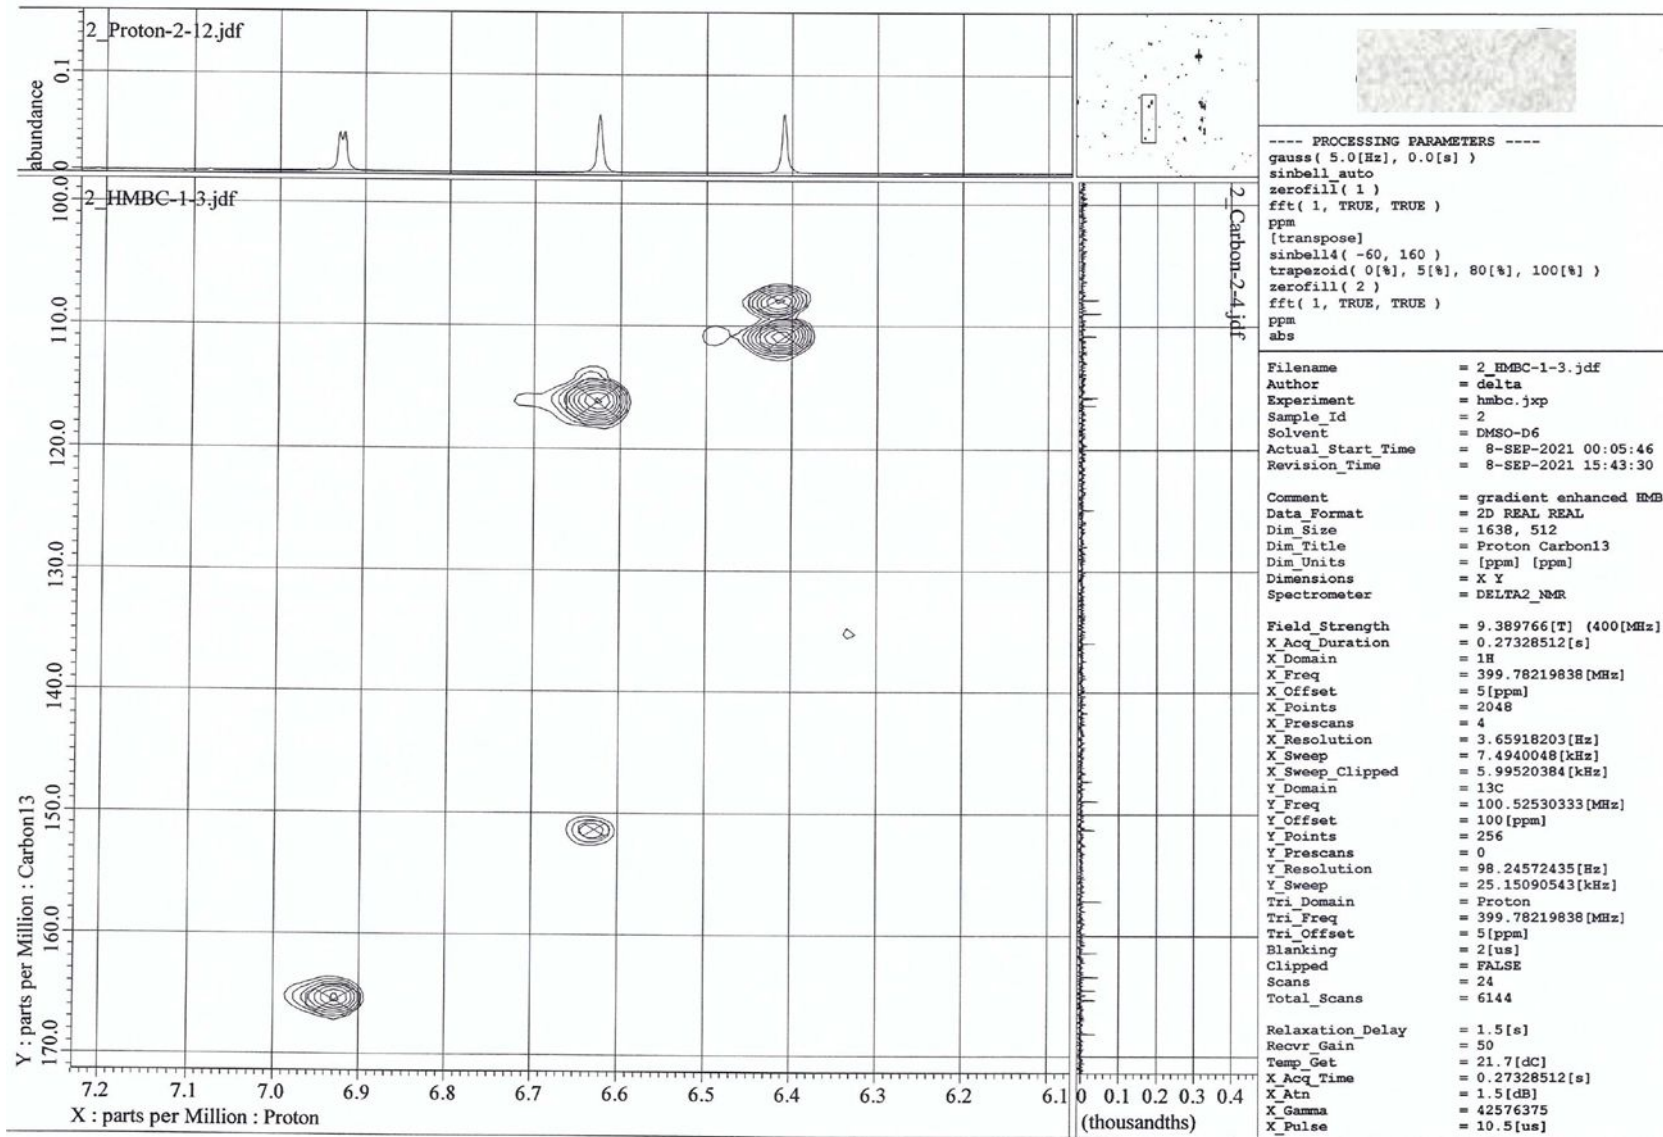



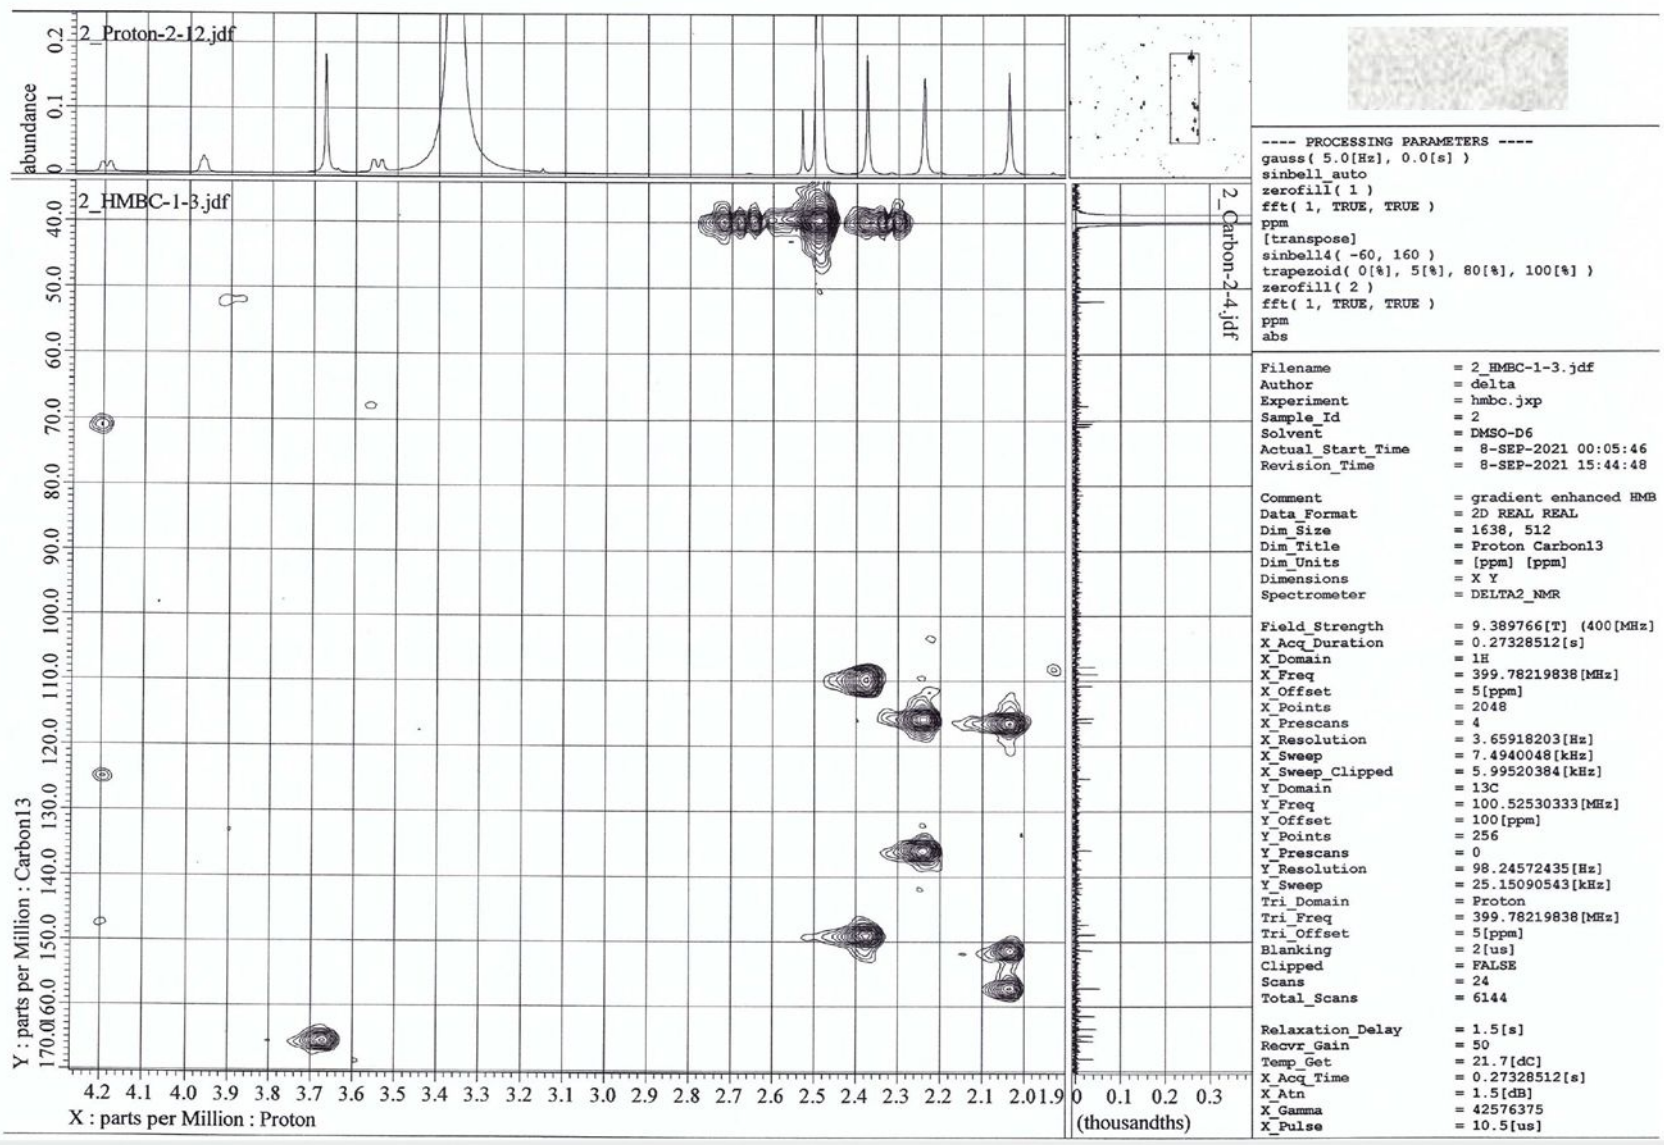

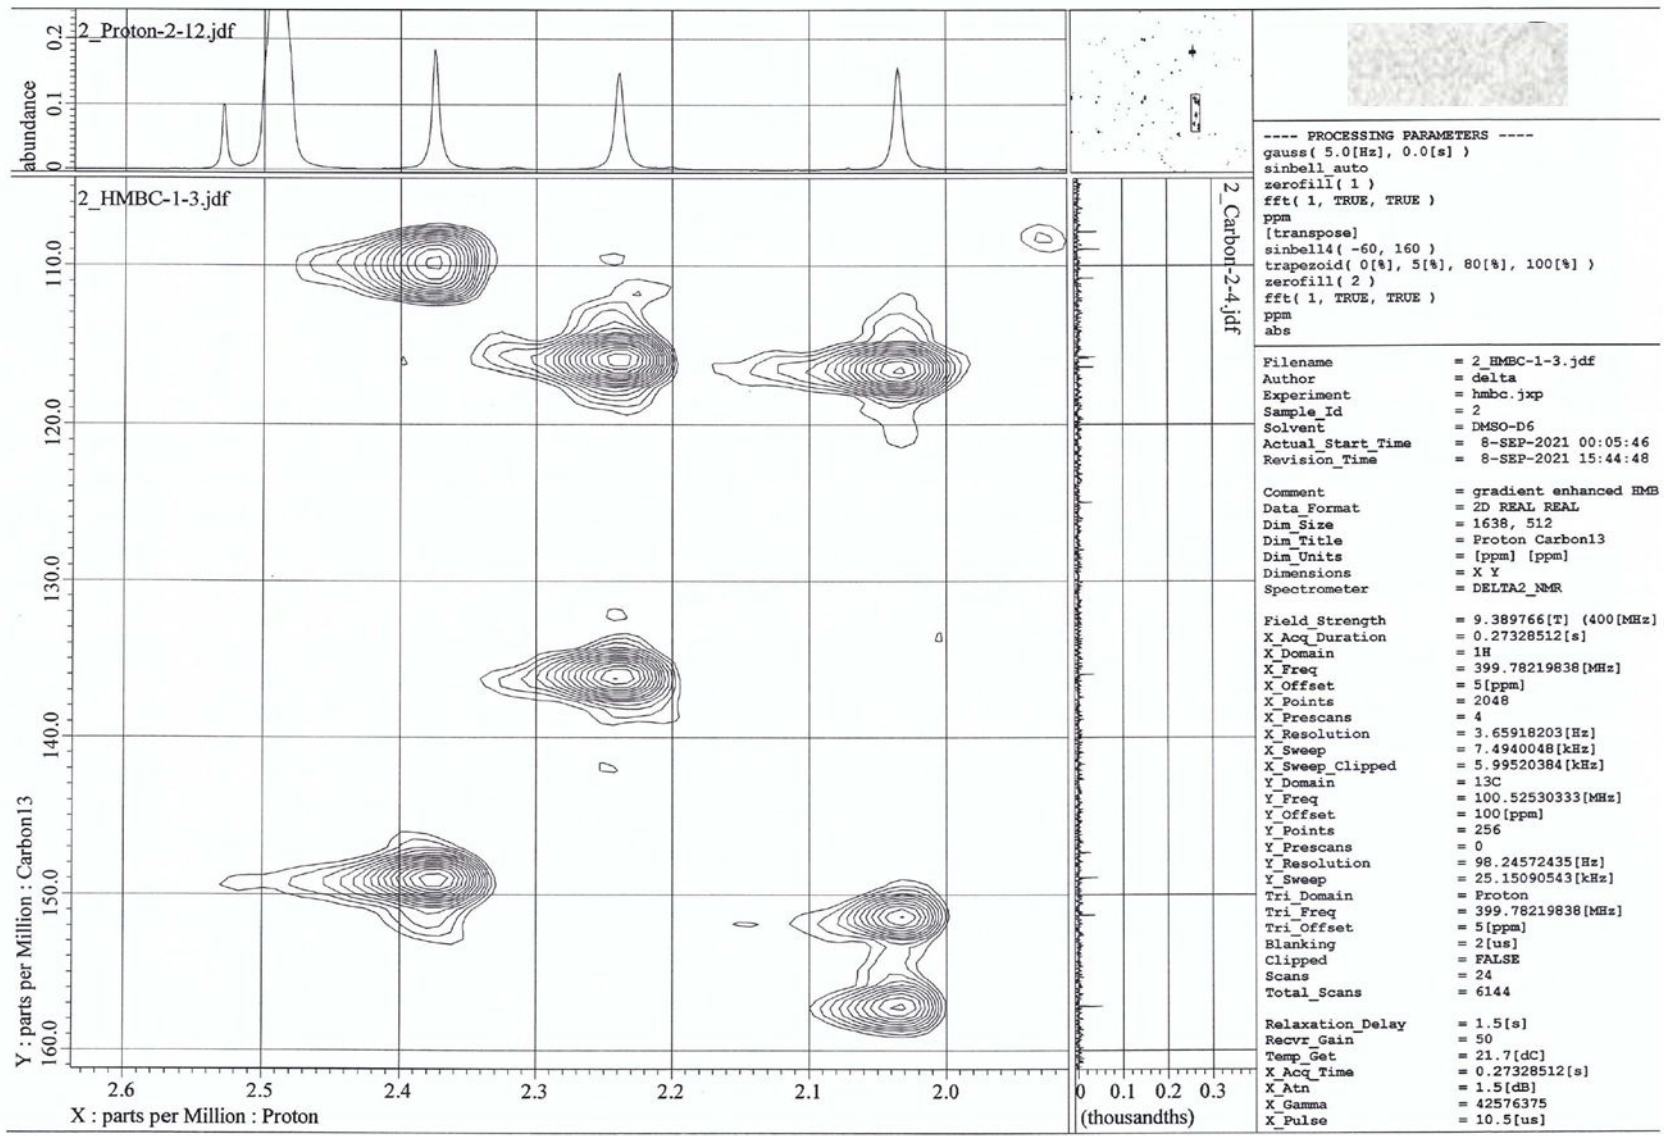

Supplement: ao3c08136_si_001.pdf [file ao3c08136_si_001.pdf]
